# Supplementary material
Source: publisher figshare collection journal article supplement (https://gsajournals.figshare.com/ndownloader/files/26335441)
Supplement: Supplementary file 1 [file 26335441]

**Supplementary Material:**

Altendorf, K. R., S. Larson, L.R. DeHaan, J. Crain, J. Neyhart. K.M. Dorn, J.A. Anderson, 2021 Nested association mapping reveals the genetic architecture of spike emergence and anthesis timing in intermediate wheatgrass. G3. In Revision.


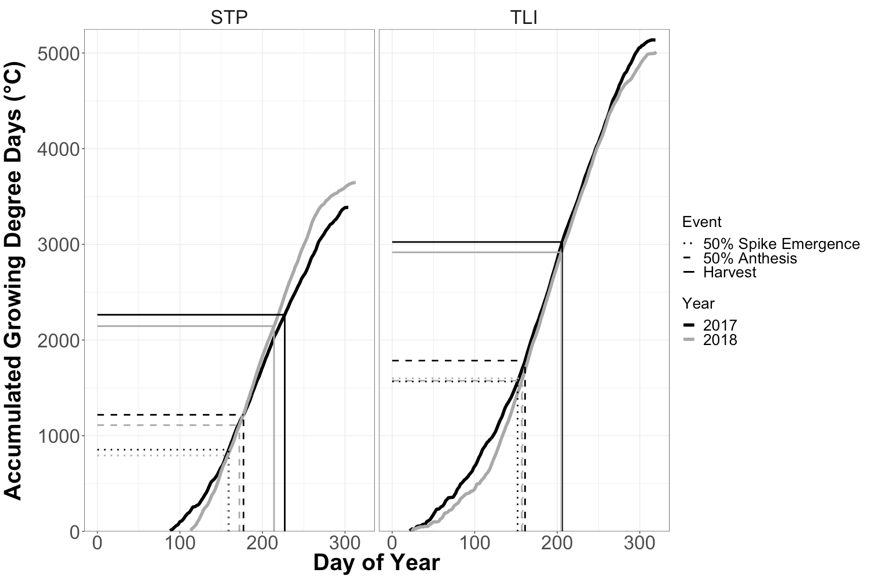


**Figure S1.** Accumulated growing degree days (GDDs) for IWG spaced plants at St. Paul, MN (STP) and the Land Institute in Salina, KS (TLI) for growing seasons 2017 (black) and 2018 (gray). Vertical and horizontal lines indicate timing of major phenological and data collection events including when the plants were at 50% spike emergence, 50% anthesis, and the date at which harvest occurred.

**
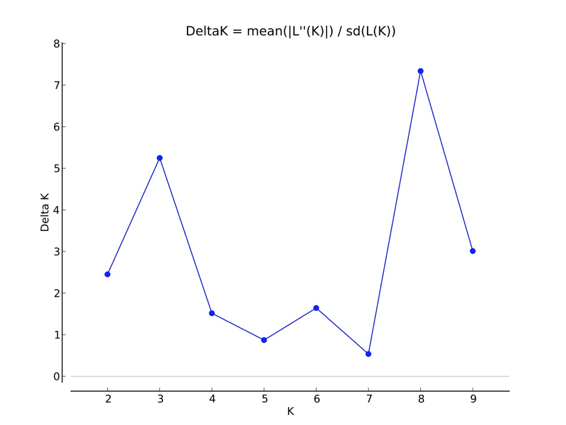
**

**Figure S2.** Delta K for groups k 1-10 from STRUCTURE analysis. Delta K was maximized at k = 8.


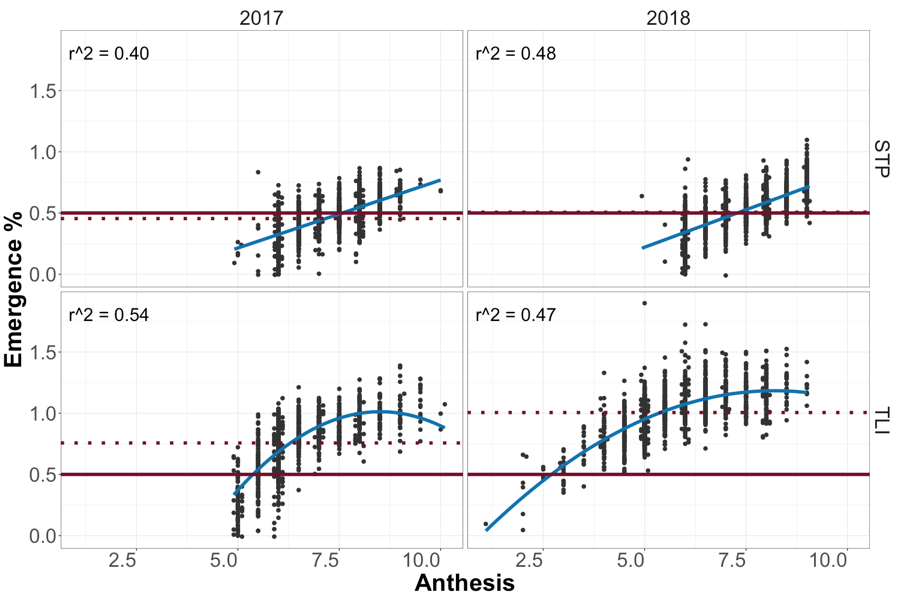


**Figure S3.** Relationships between estimated marginal means for emergence percent and anthesis in the Intermediate wheatgrass Nested Association Mapping population at St. Paul (STP) and the Land Institute (TLI; Salina, KS) in 2017 and 2018. Model fits, linear for STP 2017 and 2018, and quadratic for TLI 2017 and 2018, were highly significant (*P* < 0.0001) and variance explained (*r*2) is displayed in the bottom left corner. Horizontal maroon dotted line indicates mean emergence percent for the population to demonstrate the stage at which the data was taken, and the solid maroon line indicates 50% emergence, or the target stage for data collection.


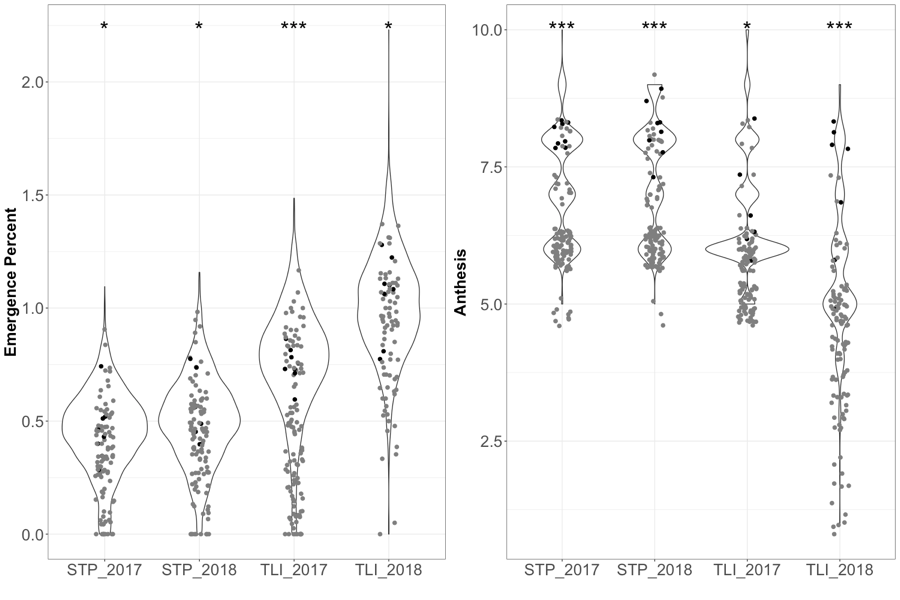


**Figure S4.** Performance of progeny derived from self-pollination (gray dots) and unintended outcrosses (black dots) relative to F1 progeny (distribution represented by the violin plot) for anthesis using the raw data (not emmeans) for both traits across all environments. A “geom_jitter” function was used in ggplot2 to offset data points to increase visibility. Stars at top indicate significance of t-test for differences between progeny derived from self-pollination and F1 progeny, where 0 = ***; 0.001 = **; 0.01 = *; 0.05 = . ; and not significant = NS.


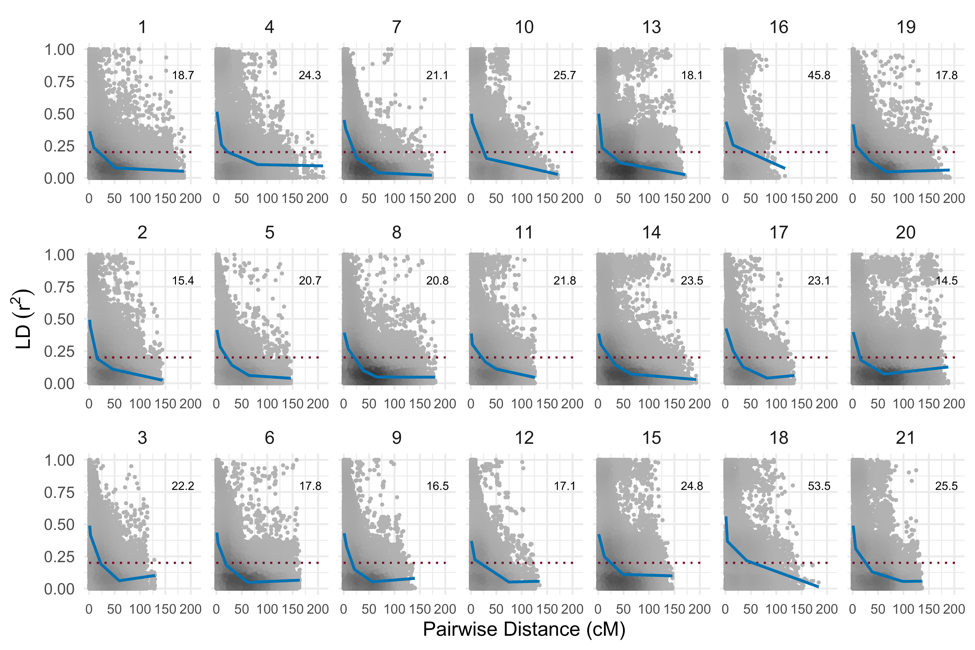


**Figure S5.** Linkage disequilibrium (LD; *r*2) across pairwise comparisons of marker distance in cM. Linkage groups are ordered in columns by homeologous groups. Text in top right indicates the cM distance where LD decays below *r*2 = 0.2 (red line). LD was calculated within each family and linkage group separately and data were pooled for the estimation of decay. Varying shades of gray represents density of the data points (dark gray = higher density).


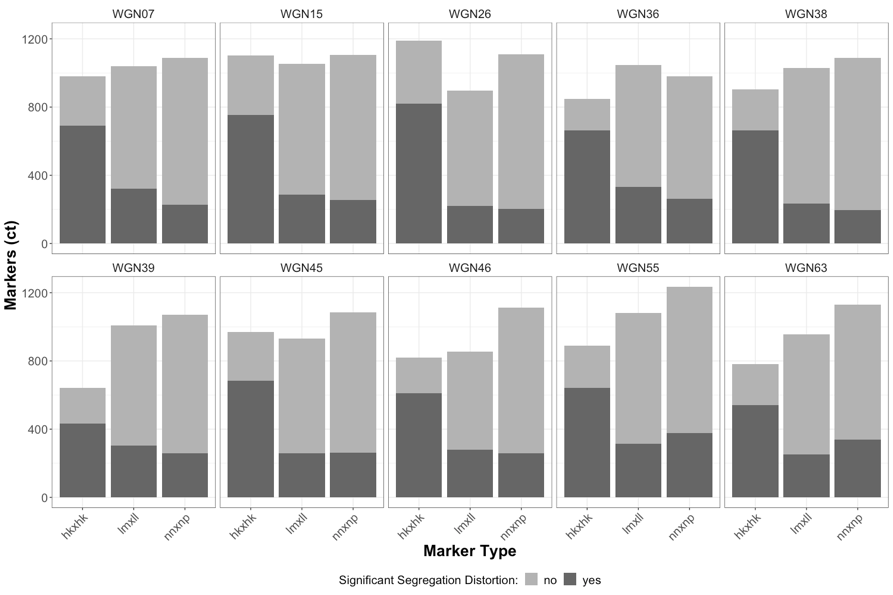


**Figure S6.** Marker count before filtering and map creation by family and type with gray shades indicating the proportion with significant segregation distortion (**α** = 0.1).


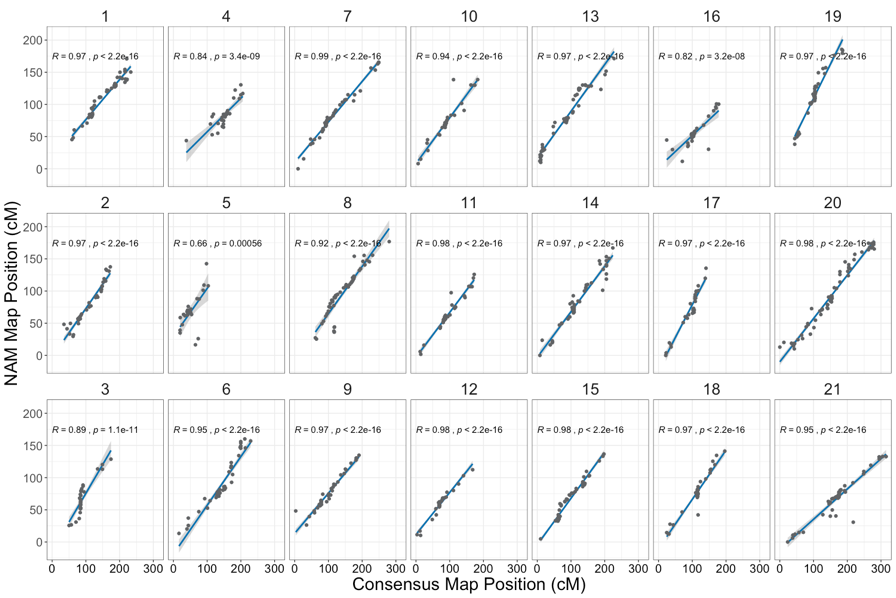


**Figure S7.** Correlation of map positions of markers shared (*n* = 1159) between the nested association mapping population (NAM) and the existing intermediate wheatgrass consensus map (Kantarski *et al.* 2016) with correlation coefficients and p-value in the upper left corner.


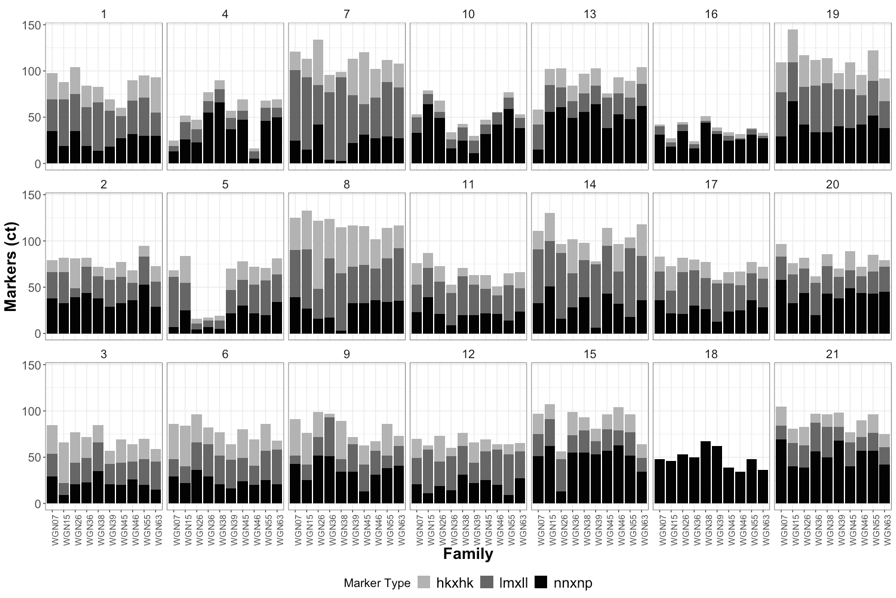


**Figure S8.** Marker counts used in linkage mapping by family and linkage group, colored by type. Columns represent homeologous groups.

**Figure S9.** Pedigree of the eleven Nested Association Mapping founders (green circles) and their male parents (green) and female parents (blue). Mothers were traced from pedigree records and male parents identified through genotypic data using a parentage analysis in Cervus v3.0 (Kalinowski *et al.* 2007). Parents from UMN Cycle 1 were not genotyped and therefore the male parents were not identifiable and are referred to as UMN_Cycle1_Unknown.


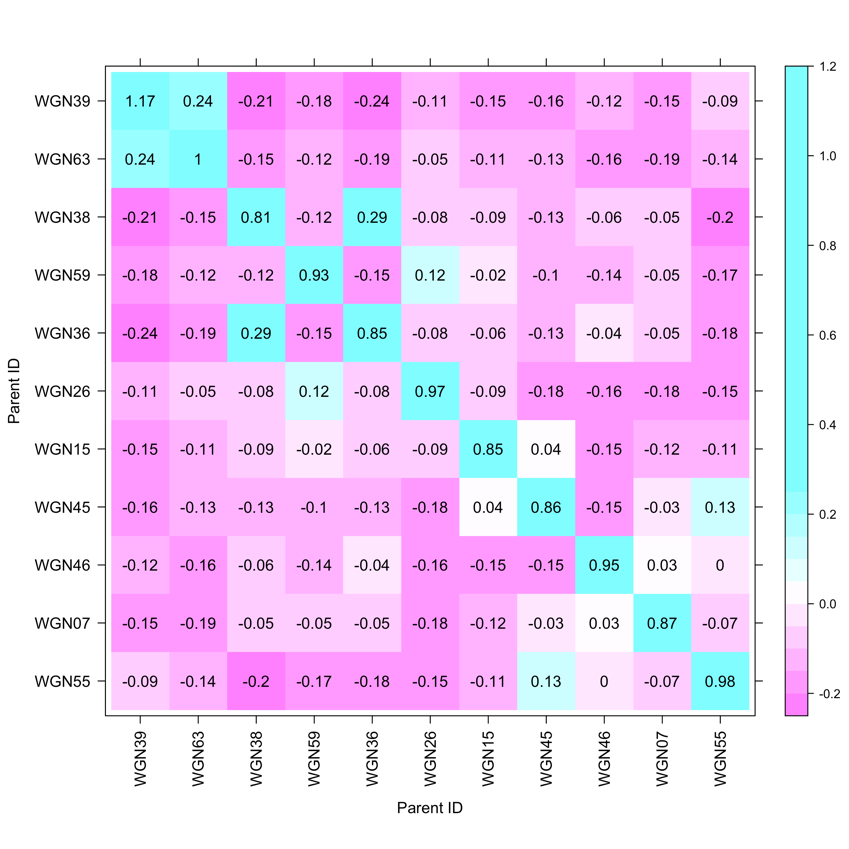


**Figure S10.** Heat map of the genetic relationship between the eleven intermediate wheatgrass (IWG) Nested Association Mapping (NAM) founder parents, where values greater than one indicate inbreeding, and values less than one indicate more heterozygosity than expected in Hardy Weinberg Equilibrium.

**Table S1.** Flowering time candidate orthologous genes and their positions within the IWG v2 draft genome using a BLAST search.

| **Candidate Gene** | **Gene Abbreviation** | **Chromosome** | **Thinopyrum_intermedium_v2.1_Gene_ID** | **Thinopyrum_intermedium_v2.1_Location** | **Citation** |
| --- | --- | --- | --- | --- | --- |
| Constans 4 | CO4 | 4 | Thint.04G0316200 (PAC:40767717) | Chr04:192966214..192968527 forward | Griffiths *et al.* 2003 |
| Constans 4 | CO4 | 5 | Thint.05G0257400 (PAC:40869486) | Chr05:261602921..261604864 forward | Griffiths *et al*. 2003 |
| Photoperiod-H1 | PPD1 | 5 | Thint.05G0375500 (PAC:40874469) | Chr05:354865596..354869737 reverse | Turner *et al.* 2005 |
| Photoperiod-H1 | PPD1 | 6 | Thint.06G0038800 (PAC:40786313) | Chr06:27045130..27049487 reverse | Turner *et al.* 2005 |
| Phytochrome A | PHYA | 10 | Thint.10G0086600 (PAC:40752939) | Chr10:61214534..61221521 forward | Szucs *et al.* 2006 |
| Phytochrome B | PHYB | 10 | Thint.10G0176300 (PAC:40752872) | Chr10:157061435..157069917 forward | Szucs *et al.* 2006 |
| Vernalization 2 | VRN2 | 10 | Thint.10G0475000 (PAC:40754327) | Chr10:481013621..481015325 forward | Yan *et al.* 2004 |
| Phytochrome A | PHYA | 11 | Thint.11G0047900 (PAC:40877713) | Chr11:21310878..21319016 forward | Szucs *et al.* 2006 |
| Phytochrome B | PHYB | 11 | Thint.11G0137200 (PAC:40878969) | Chr11:86827094..86835628 reverse | Szucs *et al.* 2006 |
| Phytochrome A | PHYA | 12 | Thint.12G0032700 (PAC:40930513) | Chr12:24840576..24847504 forward | Szucs *et al.* 2006 |
| Phytochrome B | PHYB | 12 | Thint.12G0258100 (PAC:40927915) | Chr12:280435706..280444833 forward | Szucs *et al.* 2006 |
| Constans 3 | CO3 | 13 | Thint.13G0137700 (PAC:40825348) | Chr13:125105104..125107577 reverse | Griffiths *et al.* 2003 |
| Phytochrome C | PHYC | 13 | Thint.13G0431400 (PAC:40827917) | Chr13:323480478..323484904 forward | Nishida e*t al.* 2013 |
| Vernalization 1 | VRN1 | 13 | Thint.13G0431900 (PAC:40832210) | Chr13:324160732..324176581 reverse | Fu *et al.* 2005 |
| Constans 3 | CO3 | 14 | Thint.14G0224600 (PAC:40891044) | Chr14:195237733..195239455 reverse | Griffiths *et al.* 2003 |
| Phytochrome C | PHYC | 14 | Thint.14G0482000 (PAC:40888107) | Chr14:390253799..390258375 forward | Nishida *et al.* 2013 |
| Vernalization 1 | VRN1 | 14 | Thint.14G0482700 (PAC:40886324) | Chr14:391026978..391041691 reverse | Fu *et al.* 2005 |
| Constans 3 | CO3 | 15 | Thint.15G0166900 (PAC:40740161) | Chr15:147481998..147484266 reverse | Griffiths *et al.* 2003 |
| Phytochrome C | PHYC | 15 | Thint.15G0525600 (PAC:40744510) | Chr15:487687017..487691775 forward | Nishida *et al.* 2013 |
| Constans 2 | CO2 | 16 | Thint.16G0336500 (PAC:40861757) | Chr16:282901195..282903373 forward | Griffiths *et al.* 2003 |
| Constans 7 | CO7 | 16 | Thint.16G0195800 (PAC:40861917) | Chr16:163882256..163883863 forward | Griffiths *et al.* 2003 |
| Constans 2 | CO2 | 17 | Thint.17G0350200 (PAC:40846060) | Chr17:250837821..250839697 forward | Griffiths *et al.* 2003 |
| Constans 7 | CO7 | 17 | Thint.17G0194800 (PAC:40849143) | Chr17:109117832..109120461 reverse | Griffiths *et al.* 2003 |
| Phytochrome B | PHYB | 17 | Thint.17G0477300 (PAC:40847934) | Chr17:317308565..317317662 reverse | Szucs *et al.* 2006 |
| Constans 2 | CO2 | 18 | Thint.18G0412200 (PAC:40860003) | Chr18:385715765..385717590 reverse | Griffiths *et al.* 2003 |
| Constans 7 | CO7 | 18 | Thint.18G0174100 (PAC:40854031) | Chr18:107515904..107517942 reverse | Griffiths *et al.* 2003 |
| Phytochrome B | PHYB | 18 | Thint.18G0590700 (PAC:40855696) | Chr18:501559687..501568393 reverse | Szucs *et al.* 2006 |
| Constans 1 | CO1 | 19 | Thint.19G0346900 (PAC:40807196) | Chr19:276805223..276807647 forward | Griffiths *et al.* 2003 |
| Constans 8 | C08 | 19 | Thint.19G0217900 (PAC:40813475) | Chr19:133512182..133513265 reverse | Griffiths *et al.* 2003 |
| Phytochrome A | PHYA | 19 | Thint.19G0061100 (PAC:40802739) | Chr19:39327457..39333687 reverse | Szucs *et al.* 2006 |
| Vernalization 3 | VRN3 | 19 | Thint.19G0173000 (PAC:40810775) | Chr19:109865807..109867553 forward | Yan *et al.* 2006 |
| Constans 1 | CO1 | 20 | Thint.20G0509900 (PAC:40912526) | Chr20:306621230..306624352 forward | Griffiths *et al.* 2003 |
| Constans 8 | C08 | 20 | Thint.20G0413600 (PAC:40913524) | Chr20:240724439..240725516 reverse | Griffiths *et al.* 2003 |
| Phytochrome A | PHYA | 20 | Thint.20G0104000 (PAC:40908395) | Chr20:59480541..59487096 forward | Szucs *et al.* 2006 |
| Vernalization 3 | VRN3 | 20 | Thint.20G0283200 (PAC:40907282) | Chr20:166756027..166758180 reverse | Yan *et al.* 2006 |
| Constans 1 | CO1 | 21 | Thint.21G0192000 (PAC:40894330) | Chr21:98667185..98669458 reverse | Griffiths *et al.* 2003 |
| Constans 6 | CO6 | 21 | Thint.21G0599800 (PAC:40898056) | Chr21:376609197..376611086 reverse | Griffiths *et al.* 2003 |
| Constans 8 | C08 | 21 | Thint.21G0289900 (PAC:40898427) | Chr21:149256110..149257252 forward | Griffiths *et al.* 2003 |
| Photoperiod-H1 | PPD1 | 21 | Thint.21G0032800 (PAC:40896564) | Chr21:19457537..19461753 reverse | Turner *et al.* 2005 |

**Table S2**. Results from correlation analysis of the difference between average phenotypic performance of parents of a cross and the standard deviation of progeny for each trait and environment.

|  |  | **Emergence Percent** | | **Anthesis Score** | |
| --- | --- | --- | --- | --- | --- |
| **Location** | **Year** | ***r*** | **P-value** | ***r*** | **P-value** |
| STP | 2017 | -0.07 | 0.84 | -0.38 | 0.28 |
| STP | 2018 | -0.04 | 0.90 | 0.10 | 0.79 |
| TLI | 2017 | 0.01 | 0.98 | 0.84 | 0.00 |
| TLI | 2018 | 0.59 | 0.07 | -0.05 | 0.88 |

**Table S3.** Results from a t-test (α = 0.05) for maternal effect in the NAM families for emergence percent across all four environments, where C is the common parent, and D is the donor parent.

|  | **STP 2017** | | | **STP 2018** | | | **TLI 2017** | | | **TLI 2018** | | |
| --- | --- | --- | --- | --- | --- | --- | --- | --- | --- | --- | --- | --- |
| **Family** | **C** | **D** | **P-value** | **C** | **D** | **P-value** | **C** | **D** | **P-value** | **C** | **D** | **P-value** |
| WGN07 | 0.5 | 0.52 | NS | 0.57 | 0.58 | NS | 0.86 | 0.84 | NS | 1.12 | 1.11 | NS |
| WGN15 | 0.51 | 0.5 | NS | 0.53 | 0.57 | NS | 0.71 | 0.68 | NS | 0.96 | 0.99 | NS |
| WGN26 | 0.39 | 0.41 | NS | 0.44 | 0.45 | NS | 0.66 | 0.73 | NS | 1 | 1.03 | NS |
| WGN36 | 0.42 | 0.42 | NS | 0.48 | 0.43 | NS | 0.82 | 0.81 | NS | 1.08 | 1.04 | NS |
| WGN38 | 0.48 | 0.46 | NS | 0.49 | 0.46 | NS | 0.9 | 0.83 | NS | 1.11 | 1.1 | NS |
| WGN39 | 0.36 | 0.3 | 0.038 | 0.39 | 0.36 | NS | 0.73 | 0.68 | NS | 0.87 | 0.79 | 0.020 |
| WGN45 | 0.54 | 0.5 | NS | 0.63 | 0.62 | NS | 0.75 | 0.7 | NS | 1.14 | 1.06 | 0.040 |
| WGN46 | 0.51 | 0.54 | NS | 0.62 | 0.64 | NS | 0.85 | 0.89 | NS | 1.07 | 1.09 | NS |
| WGN55 | 0.54 | 0.55 | NS | 0.59 | 0.56 | NS | 0.75 | 0.73 | NS | 0.92 | 0.92 | NS |
| WGN63 | 0.37 | 0.36 | NS | 0.39 | 0.39 | NS | 0.77 | 0.75 | NS | 0.96 | 0.93 | NS |

**Table S4.** Results from a t-test (α = 0.05) for maternal effect in the NAM families for anthesis score across all four environments, where C is the common parent, and D is the donor parent.

|  | **STP 2017** | | | **STP 2018** | | | **TLI 2017** | | | **TLI 2018** | | |
| --- | --- | --- | --- | --- | --- | --- | --- | --- | --- | --- | --- | --- |
| **Family** | **C** | **D** | **P-value** | **C** | **D** | **P-value** | **C** | **D** | **P-value** | **C** | **D** | **P-value** |
| WGN07 | 7.28 | 7.34 | NS | 7.62 | 7.48 | NS | 6.99 | 6.79 | NS | 6.51 | 6.13 | NS |
| WGN15 | 7.11 | 7.12 | NS | 7.44 | 7.54 | NS | 6.1 | 6.01 | NS | 5.03 | 5.15 | NS |
| WGN26 | 6.75 | 7.03 | NS | 7.03 | 7.25 | NS | 6.11 | 6.39 | 0.037 | 5.74 | 5.89 | NS |
| WGN36 | 6.62 | 6.53 | NS | 6.74 | 6.63 | NS | 6.92 | 6.74 | NS | 6.19 | 5.83 | NS |
| WGN38 | 6.75 | 6.38 | 0.010 | 6.92 | 6.45 | 0.006 | 7.17 | 6.56 | 0.005 | 6.31 | 5.98 | NS |
| WGN39 | 6.69 | 6.56 | NS | 6.89 | 6.89 | NS | 6.19 | 6.12 | NS | 5.13 | 4.83 | NS |
| WGN45 | 7.9 | 7.67 | NS | 8.27 | 8.19 | NS | 6.39 | 6.2 | NS | 5.89 | 5.68 | NS |
| WGN46 | 7.8 | 7.81 | NS | 8.12 | 8.09 | NS | 7.26 | 7.47 | NS | 7.21 | 7.36 | NS |
| WGN55 | 8.03 | 8.2 | NS | 8.09 | 7.94 | NS | 6.49 | 6.41 | NS | 5.27 | 5.11 | NS |
| WGN63 | 6.95 | 6.93 | NS | 6.74 | 6.73 | NS | 6.36 | 6.21 | NS | 5.16 | 4.92 | 0.043 |
